# Supplementary material
Source: PubMed Central journal article supplement (PMC2804815)
Supplement: supp_108.072736_biolreprod.108.072736-1.pdf [file supp_108.072736_biolreprod.108.072736-1.pdf]

Sun et al., Supplemental Figure 1

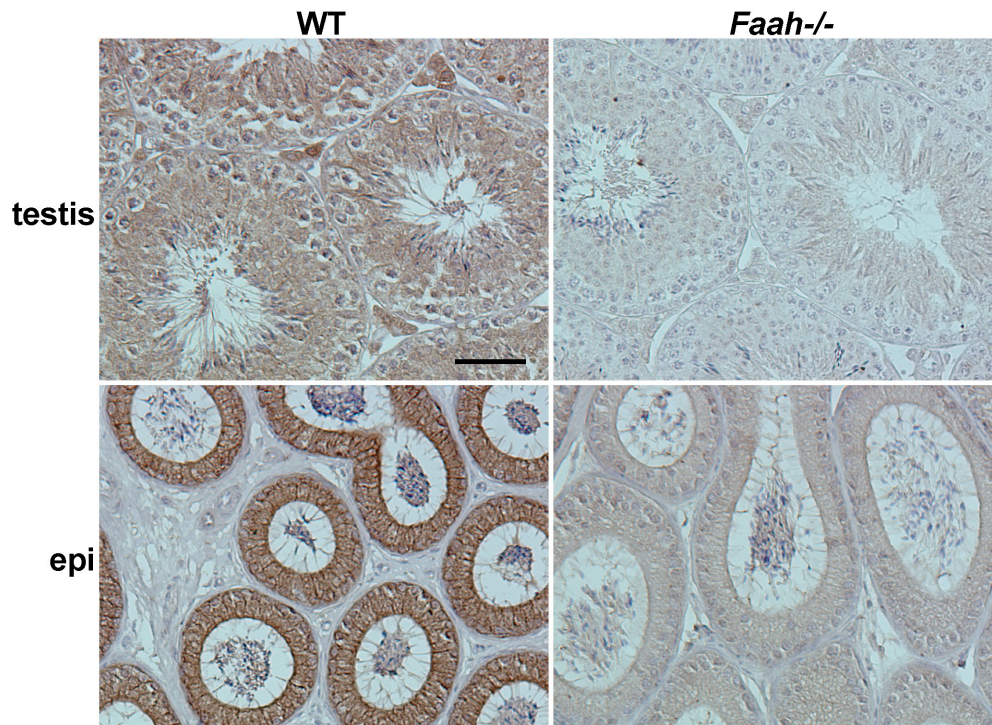

Supplemental figure 1. FAAH protein is absent in *Faah*<sup>-/-</sup> testis and epididymis. Immunostaining of FAAH in the testis and epididymis of WT and *Faah*<sup>-/-</sup> mice. Epi, epididymis. Bar, 50 $\mu$ m.

Sun et al., Supplemental Figure 2

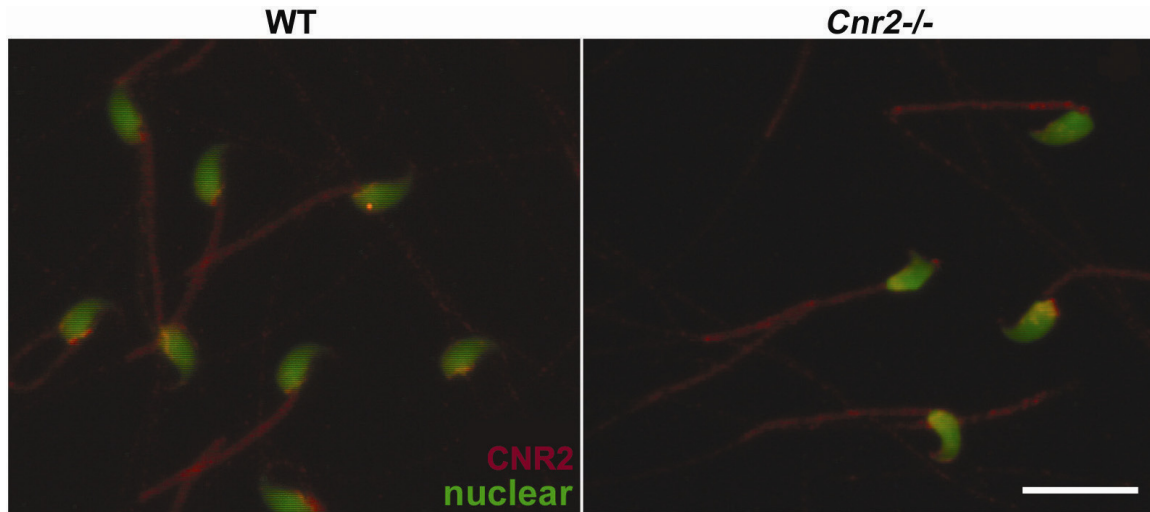

Supplemental figure 2. CNR2 is undetectable in sperm. Non-specific fluorescence (red) was noted in the midpiece of both WT and *Cnr2*<sup>-/-</sup> sperm. Bar, 10  $\mu$ m.

Sun et al., Supplemental Figure 3

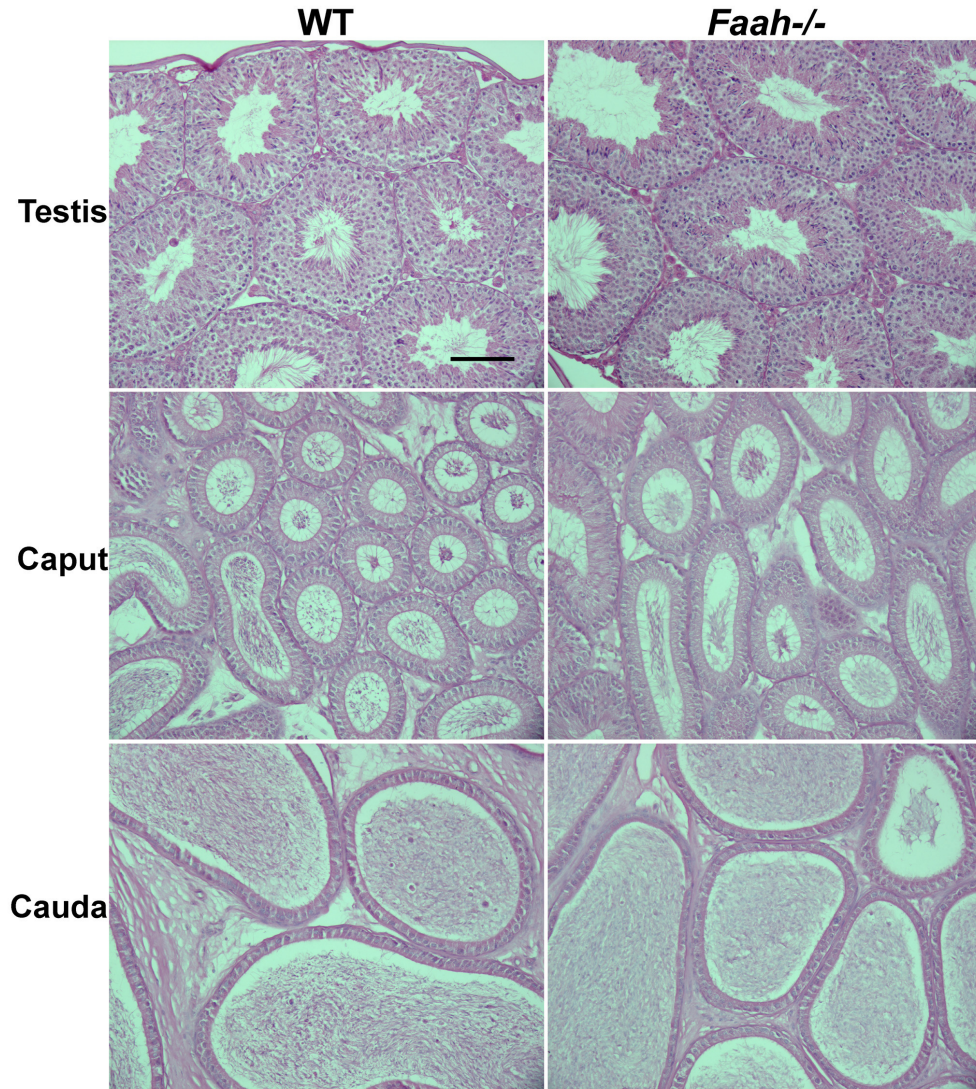

Supplemental figure 3. The histology of *Faah*<sup>-/-</sup> testis and epididymis is comparable to those of WT mice. H&E staining of the testis, caput and cauda sections from *Faah*<sup>-/-</sup> males show similar histology as WT males. Bar, 100  $\mu$ m.

Sun et al., Supplemental Figure 4

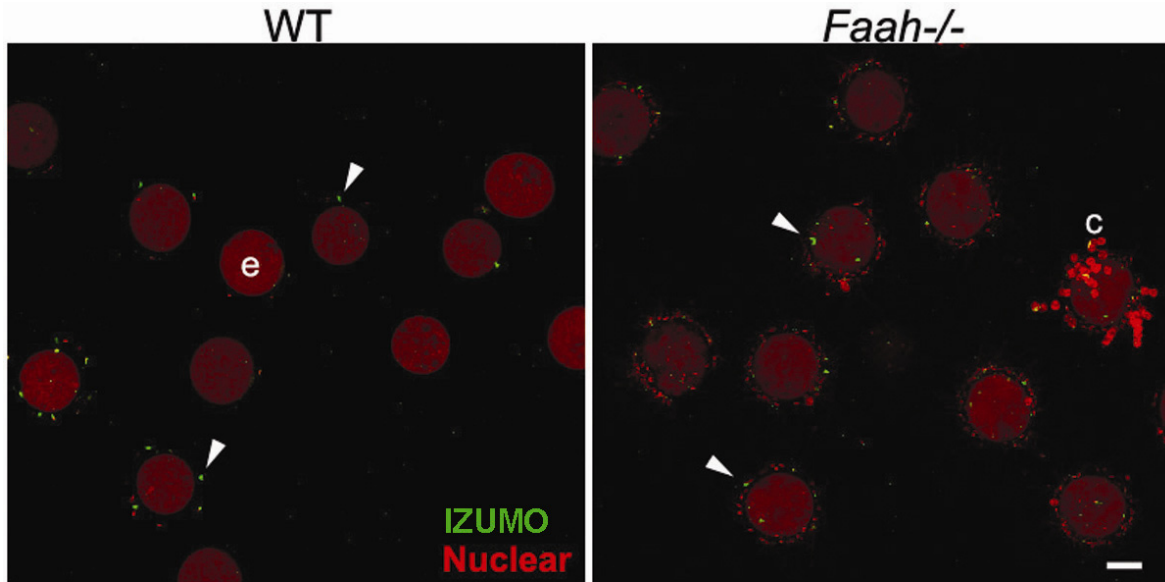

Supplemental figure 4. Immunofluorescence of IZUMO in sperm. After 2 hours of incubation with zona-intact WT eggs, sperm on the zona were stained with propidium iodide (red) and with antibody to IZUMO (green). Arrowheads indicate acrosome-reacted sperm on eggs. Bar, 40 $\mu$ m. e, egg; c, cumulus cells.
